# Supplementary material
Source: MDPI journal article supplement (https://www.mdpi.com/2071-1050/15/10/8285)
Supplement: s1 [file s1]

### Supplementary Table

#### Supplementary Table S1

Rainfall characteristics during the investigation period of 2018 (monsoon season :June to September).

| Event | Sampling date | Rainfall amount (mm) | Rainfall duration (hours) | Maximum rainfall intensity in 5 min (mm hour <sup>-1</sup> ) | Maximum rainfall intensity in 10 min (mm hour <sup>-1</sup> ) | Maximum rainfall intensity in 15 min (mm hour <sup>-1</sup> ) | Maximum rainfall intensity in 30 min (mm hour <sup>-1</sup> ) | Mean rainfall intensity (mm hour <sup>-1</sup> ) | Cumulative precipitation during the previous 3 days (mm) | Cumulative precipitation during the previous 5 days (mm) | Cumulative precipitation during the previous 7 days (mm) |
|-------|---------------|----------------------|---------------------------|--------------------------------------------------------------|---------------------------------------------------------------|---------------------------------------------------------------|---------------------------------------------------------------|--------------------------------------------------|----------------------------------------------------------|----------------------------------------------------------|----------------------------------------------------------|
| 1     | 2.6.2018      | 15.20                | 4.56                      | 98.84                                                        | 55.55                                                         | 42.89                                                         | 28.58                                                         | 3.34                                             | 15.20                                                    | 15.20                                                    | 15.20                                                    |
| 2     | 6.6.2018      | 52.00                | 6.48                      | 61.18                                                        | 30.92                                                         | 21.80                                                         | 14.77                                                         | 8.02                                             | 52.00                                                    | 67.20                                                    | 67.20                                                    |
| 3     | 16.6.2018     | 8.50                 | 2.70                      | 9.44                                                         | 5.76                                                          | 4.43                                                          | 2.89                                                          | 3.15                                             | 14.50                                                    | 14.50                                                    | 19.64                                                    |
| 4     | 17.6.2018     | 10.00                | 6.98                      | 29.92                                                        | 28.15                                                         | 23.18                                                         | 16.48                                                         | 1.43                                             | 24.50                                                    | 24.50                                                    | 29.64                                                    |
| 5     | 29.6.2018     | 24.90                | 8.71                      | 38.85                                                        | 28.58                                                         | 20.45                                                         | 19.78                                                         | 2.86                                             | 24.90                                                    | 28.17                                                    | 28.17                                                    |
| 6     | 1.7.2018      | 21.90                | 5.03                      | 59.79                                                        | 40.22                                                         | 37.66                                                         | 27.32                                                         | 4.35                                             | 46.80                                                    | 46.80                                                    | 50.07                                                    |
| 7     | 2.07.2018     | 10.40                | 5.55                      | 44.40                                                        | 33.22                                                         | 26.97                                                         | 18.49                                                         | 1.87                                             | 32.30                                                    | 57.20                                                    | 60.47                                                    |
| 8     | 3.7.2018      | 33.20                | 3.91                      | 82.91                                                        | 50.54                                                         | 35.05                                                         | 24.31                                                         | 8.49                                             | 65.50                                                    | 90.40                                                    | 93.67                                                    |
| 9     | 4.7.2018      | 15.40                | 6.16                      | 28.30                                                        | 28.30                                                         | 21.12                                                         | 12.99                                                         | 2.50                                             | 59.00                                                    | 80.90                                                    | 105.80                                                   |
| 10    | 11.7.2018     | 110.40               | 5.82                      | 120.77                                                       | 57.60                                                         | 46.26                                                         | 34.16                                                         | 18.97                                            | 110.40                                                   | 115.59                                                   | 130.99                                                   |
| 11    | 12.7.2018     | 38.00                | 4.67                      | 72.88                                                        | 44.95                                                         | 30.96                                                         | 18.46                                                         | 8.14                                             | 148.40                                                   | 153.59                                                   | 168.99                                                   |
| 12    | 17.7.2018     | 45.30                | 11.76                     | 119.64                                                       | 57.71                                                         | 51.19                                                         | 45.47                                                         | 3.85                                             | 45.30                                                    | 83.30                                                    | 193.70                                                   |
| 13    | 19.7.2018     | 13.70                | 7.05                      | 14.46                                                        | 13.97                                                         | 11.10                                                         | 9.49                                                          | 1.94                                             | 59.00                                                    | 59.00                                                    | 97.00                                                    |
| 14    | 23.7.2018     | 15.30                | 0.60                      | 75.02                                                        | 36.02                                                         | 33.41                                                         | 28.69                                                         | 25.50                                            | 21.70                                                    | 35.40                                                    | 80.70                                                    |
| 15    | 26.7.2018     | 21.30                | 2.90                      | 30.36                                                        | 19.41                                                         | 17.27                                                         | 16.01                                                         | 7.34                                             | 36.60                                                    | 43.00                                                    | 56.70                                                    |
| 16    | 27.7.2018     | 61.60                | 8.31                      | 135.28                                                       | 57.83                                                         | 39.58                                                         | 39.32                                                         | 7.41                                             | 82.90                                                    | 104.60                                                   | 104.60                                                   |
| 17    | 28.7.2018     | 71.50                | 23.62                     | 19.07                                                        | 12.12                                                         | 9.82                                                          | 8.59                                                          | 3.03                                             | 154.40                                                   | 169.70                                                   | 176.10                                                   |
| 18    | 29.7.2018     | 21.50                | 9.57                      | 12.26                                                        | 7.06                                                          | 5.59                                                          | 3.97                                                          | 2.25                                             | 154.60                                                   | 175.90                                                   | 197.60                                                   |
| 19    | 2.8.2018      | 22.20                | 1.81                      | 48.92                                                        | 39.56                                                         | 28.42                                                         | 15.39                                                         | 12.27                                            | 34.00                                                    | 57.80                                                    | 190.90                                                   |
| 20    | 3.8.2018      | 14.00                | 6.16                      | 14.85                                                        | 6.85                                                          | 5.01                                                          | 2.49                                                          | 2.27                                             | 44.50                                                    | 50.30                                                    | 143.30                                                   |
| 21    | 5.8.2018      | 48.80                | 22.03                     | 121.71                                                       | 57.80                                                         | 41.52                                                         | 36.48                                                         | 2.22                                             | 67.10                                                    | 97.60                                                    | 103.40                                                   |

Continue .....

|    |           |        |       |       |       |       |       |       |        |        |        |
|----|-----------|--------|-------|-------|-------|-------|-------|-------|--------|--------|--------|
| 22 | 6.8.2018  | 131.30 | 20.61 | 41.04 | 29.52 | 28.22 | 19.69 | 6.37  | 184.40 | 220.60 | 232.40 |
| 23 | 12.8.2018 | 27.30  | 12.12 | 39.43 | 39.43 | 32.70 | 22.28 | 2.25  | 39.40  | 57.80  | 237.90 |
| 24 | 13.8.2018 | 145.50 | 23.60 | 42.30 | 20.28 | 14.98 | 9.47  | 6.17  | 184.90 | 192.30 | 334.60 |
| 25 | 25.8.2018 | 27.80  | 5.57  | 36.03 | 22.43 | 20.52 | 15.15 | 4.99  | 27.80  | 27.80  | 31.80  |
| 26 | 26.8.2018 | 22.70  | 5.29  | 21.28 | 13.90 | 11.03 | 6.33  | 4.29  | 50.50  | 50.50  | 54.50  |
| 27 | 29.8.2018 | 30.60  | 10.33 | 33.72 | 26.46 | 21.45 | 17.49 | 2.96  | 53.30  | 81.10  | 81.10  |
| 28 | 30.8.2018 | 36.90  | 6.88  | 29.99 | 24.26 | 16.66 | 13.21 | 5.36  | 67.50  | 92.20  | 118.00 |
| 29 | 31.8.2018 | 23.20  | 13.99 | 53.00 | 46.37 | 29.22 | 26.06 | 1.66  | 90.70  | 90.70  | 141.20 |
| 30 | 1.9.2018  | 54.60  | 4.12  | 54.47 | 41.46 | 32.15 | 21.16 | 13.25 | 114.70 | 145.30 | 195.80 |
| 31 | 2.9.2018  | 27.60  | 2.27  | 48.41 | 31.78 | 29.49 | 18.46 | 12.16 | 105.40 | 172.90 | 195.60 |
| 32 | 11.9.2018 | 25.00  | 7.57  | 32.78 | 32.78 | 25.49 | 13.99 | 3.30  | 26.60  | 26.60  | 37.20  |
| 33 | 14.9.2018 | 33.80  | 4.36  | 29.78 | 25.46 | 21.15 | 16.45 | 7.75  | 44.20  | 70.80  | 70.80  |
| 34 | 24.9.2018 | 20.50  | 21.54 | 15.22 | 11.94 | 9.08  | 6.23  | 0.95  | 54.30  | 54.30  | 54.30  |
| 35 | 25.9.2018 | 35.70  | 11.01 | 14.03 | 14.03 | 11.01 | 7.45  | 3.24  | 73.30  | 90.00  | 90.00  |

## Supplementary Table S2

Rainfall characteristics during the investigation period of 2019 (monsoon season :June to September).

| Event | Sampling date | Rainfall amount (mm) | Rainfall duration (hours) | Maximum rainfall intensity in 5 min (mm hour <sup>-1</sup> ) | Maximum rainfall intensity in 10 min (mm hour <sup>-1</sup> ) | Maximum rainfall intensity in 15 min (mm hour <sup>-1</sup> ) | Maximum rainfall intensity in 30 min (mm hour <sup>-1</sup> ) | Mean rainfall intensity (mm hour <sup>-1</sup> ) | Cumulative precipitation during the previous 3 days (mm) | Cumulative precipitation during the previous 5 days (mm) | Cumulative precipitation during the previous 7 days (mm) |
|-------|---------------|----------------------|---------------------------|--------------------------------------------------------------|---------------------------------------------------------------|---------------------------------------------------------------|---------------------------------------------------------------|--------------------------------------------------|----------------------------------------------------------|----------------------------------------------------------|----------------------------------------------------------|
| 1     | 18.06.2019    | 17.80                | 6.23                      | 38.64                                                        | 27.05                                                         | 19.32                                                         | 9.93                                                          | 2.86                                             | 17.80                                                    | 25.30                                                    | 25.30                                                    |
| 2     | 23.06.2019    | 15.70                | 0.90                      | 83.09                                                        | 53.24                                                         | 37.82                                                         | 19.70                                                         | 17.44                                            | 15.70                                                    | 33.50                                                    | 33.50                                                    |
| 3     | 02.07.2019    | 32.80                | 2.83                      | 91.77                                                        | 47.40                                                         | 36.58                                                         | 29.18                                                         | 11.59                                            | 32.80                                                    | 32.80                                                    | 32.80                                                    |
| 4     | 04.07.2019    | 13.80                | 2.04                      | 42.18                                                        | 25.88                                                         | 19.51                                                         | 12.16                                                         | 6.76                                             | 46.60                                                    | 46.60                                                    | 46.60                                                    |
| 5     | 05.07.2019    | 17.40                | 6.43                      | 56.43                                                        | 41.51                                                         | 30.15                                                         | 16.65                                                         | 2.71                                             | 31.20                                                    | 64.00                                                    | 64.00                                                    |
| 6     | 08.07.2019    | 79.30                | 5.20                      | 90.41                                                        | 57.77                                                         | 52.02                                                         | 32.16                                                         | 15.25                                            | 79.30                                                    | 110.50                                                   | 143.40                                                   |
| 7     | 09.07.2019    | 36.40                | 8.95                      | 91.59                                                        | 43.52                                                         | 29.88                                                         | 22.08                                                         | 4.07                                             | 115.70                                                   | 133.10                                                   | 146.90                                                   |
| 8     | 10.07.2019    | 58.40                | 2.50                      | 218.65                                                       | 142.32                                                        | 78.76                                                         | 23.24                                                         | 23.36                                            | 174.10                                                   | 174.10                                                   | 205.30                                                   |
| 9     | 15.07.2019    | 20.20                | 8.40                      | 37.22                                                        | 23.08                                                         | 15.29                                                         | 11.19                                                         | 2.40                                             | 33.50                                                    | 41.80                                                    | 215.90                                                   |
| 10    | 18.07.2019    | 27.20                | 7.36                      | 63.22                                                        | 33.23                                                         | 27.07                                                         | 26.56                                                         | 3.70                                             | 45.60                                                    | 69.10                                                    | 87.40                                                    |
| 11    | 25.07.2019    | 52.20                | 23.18                     | 46.40                                                        | 36.28                                                         | 25.03                                                         | 23.91                                                         | 2.25                                             | 52.20                                                    | 57.80                                                    | 85.00                                                    |
| 12    | 27.7.2019     | 37.10                | 17.18                     | 70.66                                                        | 48.98                                                         | 34.24                                                         | 17.55                                                         | 2.16                                             | 89.30                                                    | 89.30                                                    | 94.90                                                    |
| 13    | 28.7.2019     | 40.50                | 13.34                     | 56.77                                                        | 24.64                                                         | 18.73                                                         | 10.52                                                         | 3.04                                             | 77.60                                                    | 129.80                                                   | 129.80                                                   |
| 14    | 3.8.2019      | 68.60                | 11.28                     | 88.12                                                        | 43.19                                                         | 29.16                                                         | 24.30                                                         | 6.08                                             | 68.60                                                    | 68.60                                                    | 146.20                                                   |
| 15    | 5.8.2019      | 55.20                | 6.29                      | 38.13                                                        | 38.13                                                         | 15.44                                                         | 12.90                                                         | 8.78                                             | 123.80                                                   | 123.80                                                   | 123.80                                                   |
| 16    | 6.8.2019      | 29.70                | 6.29                      | 41.27                                                        | 28.47                                                         | 19.45                                                         | 14.16                                                         | 4.72                                             | 84.90                                                    | 153.50                                                   | 153.50                                                   |
| 17    | 7.8.2019      | 58.40                | 3.54                      | 58.79                                                        | 37.12                                                         | 36.48                                                         | 20.30                                                         | 16.50                                            | 143.30                                                   | 211.90                                                   | 211.90                                                   |
| 18    | 14.8.2019     | 14.50                | 2.91                      | 22.84                                                        | 21.73                                                         | 17.01                                                         | 10.37                                                         | 4.98                                             | 26.50                                                    | 26.50                                                    | 96.20                                                    |
| 19    | 15.8.2019     | 24.00                | 1.31                      | 29.84                                                        | 23.73                                                         | 15.01                                                         | 11.37                                                         | 18.32                                            | 38.50                                                    | 50.50                                                    | 61.80                                                    |
| 20    | 17.8.2019     | 18.80                | 11.80                     | 35.05                                                        | 28.15                                                         | 26.48                                                         | 23.51                                                         | 1.59                                             | 42.80                                                    | 57.30                                                    | 69.30                                                    |
| 21    | 18.8.2019     | 63.60                | 22.98                     | 64.15                                                        | 43.45                                                         | 28.45                                                         | 22.19                                                         | 2.77                                             | 82.40                                                    | 120.90                                                   | 132.90                                                   |

Continue .....

|    |            |        |       |        |       |       |       |       |        |        |        |
|----|------------|--------|-------|--------|-------|-------|-------|-------|--------|--------|--------|
| 22 | 19.8.2019  | 13.30  | 13.26 | 11.43  | 10.15 | 7.14  | 5.12  | 1.00  | 95.70  | 119.70 | 134.20 |
| 23 | 26.8.2019  | 64.80  | 7.78  | 76.15  | 54.15 | 46.45 | 28.49 | 8.33  | 64.80  | 64.80  | 78.10  |
| 24 | 01.09.2019 | 126.00 | 4.41  | 181.41 | 79.24 | 58.35 | 41.09 | 28.57 | 136.10 | 136.10 | 200.90 |
| 25 | 05.09.2019 | 26.30  | 4.82  | 27.51  | 25.88 | 21.04 | 12.24 | 5.46  | 36.00  | 162.00 | 162.00 |
| 26 | 27.09.2019 | 36.00  | 6.05  | 57.01  | 39.47 | 27.28 | 20.22 | 5.95  | 47.40  | 55.50  | 63.62  |
| 27 | 29.09.2019 | 90.10  | 15.43 | 95.16  | 43.82 | 33.80 | 18.80 | 5.84  | 126.10 | 145.60 | 153.72 |
| 28 | 30.09.2019 | 68.20  | 23.68 | 103.47 | 58.00 | 39.64 | 29.16 | 2.88  | 159.30 | 194.30 | 194.30 |
| 29 | 02.10.2019 | 59.40  | 3.04  | 113.14 | 58.53 | 46.78 | 29.42 | 19.54 | 127.60 | 217.70 | 253.70 |

**Supplementary Table S3**

Rainfall characteristics during the investigation period of 2020 (monsoon season :June to September).

| Event | Sampling date | Rainfall amount (mm) | Rainfall duration (hours) | Maximum rainfall intensity in 5 min (mm hour <sup>-1</sup> ) | Maximum rainfall intensity in 10 min (mm hour <sup>-1</sup> ) | Maximum rainfall intensity in 15 min (mm hour <sup>-1</sup> ) | Maximum rainfall intensity in 30 min (mm hour <sup>-1</sup> ) | Mean rainfall intensity (mm hour <sup>-1</sup> ) | Cumulative precipitation during the previous 3 days (mm) | Cumulative precipitation during the previous 5 days (mm) | Cumulative precipitation during the previous 7 days (mm) |
|-------|---------------|----------------------|---------------------------|--------------------------------------------------------------|---------------------------------------------------------------|---------------------------------------------------------------|---------------------------------------------------------------|--------------------------------------------------|----------------------------------------------------------|----------------------------------------------------------|----------------------------------------------------------|
| 1     | 1.6.2020      | 9.60                 | 9.99                      | 14.09                                                        | 8.41                                                          | 8.08                                                          | 7.00                                                          | 0.95                                             | 17.10                                                    | 25.10                                                    | 25.10                                                    |
| 2     | 5.6.2020      | 17.10                | 8.77                      | 22.15                                                        | 12.12                                                         | 8.92                                                          | 7.54                                                          | 1.96                                             | 25.80                                                    | 35.27                                                    | 35.27                                                    |
| 3     | 16.6.2020     | 50.00                | 3.08                      | 125.41                                                       | 68.06                                                         | 43.51                                                         | 28.46                                                         | 16.23                                            | 57.50                                                    | 62.80                                                    | 67.20                                                    |
| 4     | 17.6.2020     | 15.50                | 3.75                      | 89.58                                                        | 53.76                                                         | 36.92                                                         | 24.28                                                         | 4.12                                             | 65.40                                                    | 78.25                                                    | 82.65                                                    |
| 5     | 21.6.2020     | 12.90                | 6.09                      | 68.05                                                        | 46.45                                                         | 29.45                                                         | 18.01                                                         | 2.11                                             | 18.30                                                    | 33.75                                                    | 78.30                                                    |
| 6     | 8.7.2020      | 18.70                | 7.56                      | 66.46                                                        | 51.08                                                         | 27.15                                                         | 11.15                                                         | 2.47                                             | 25.68                                                    | 33.67                                                    | 42.17                                                    |
| 7     | 11.7.2020     | 49.90                | 5.12                      | 49.06                                                        | 29.07                                                         | 25.52                                                         | 19.76                                                         | 9.75                                             | 49.90                                                    | 75.59                                                    | 83.57                                                    |
| 8     | 15.7.2020     | 16.80                | 1.97                      | 34.72                                                        | 31.47                                                         | 28.16                                                         | 19.48                                                         | 8.53                                             | 24.62                                                    | 74.52                                                    | 100.20                                                   |
| 9     | 21.7.2020     | 21.30                | 5.67                      | 70.85                                                        | 58.00                                                         | 42.72                                                         | 28.14                                                         | 3.76                                             | 26.10                                                    | 30.60                                                    | 47.40                                                    |
| 10    | 25.7.2020     | 30.00                | 2.91                      | 56.37                                                        | 48.12                                                         | 21.16                                                         | 16.13                                                         | 10.31                                            | 36.90                                                    | 67.20                                                    | 67.20                                                    |
| 11    | 26.7.2020     | 25.80                | 8.31                      | 64.59                                                        | 39.41                                                         | 33.24                                                         | 18.34                                                         | 3.10                                             | 62.70                                                    | 71.70                                                    | 93.03                                                    |
| 12    | 27.7.2020     | 27.80                | 3.90                      | 59.36                                                        | 43.12                                                         | 31.12                                                         | 22.14                                                         | 7.13                                             | 83.60                                                    | 90.57                                                    | 120.80                                                   |
| 13    | 31.7.2020     | 48.60                | 10.71                     | 88.33                                                        | 47.94                                                         | 32.72                                                         | 17.06                                                         | 4.54                                             | 63.20                                                    | 115.80                                                   | 153.70                                                   |
| 14    | 10.8.2020     | 23.00                | 8.40                      | 69.03                                                        | 39.15                                                         | 28.20                                                         | 20.52                                                         | 2.74                                             | 32.72                                                    | 32.72                                                    | 32.72                                                    |
| 15    | 11.8.2020     | 74.20                | 14.29                     | 128.69                                                       | 58.18                                                         | 39.88                                                         | 32.31                                                         | 5.19                                             | 97.20                                                    | 110.40                                                   | 122.10                                                   |
| 16    | 16.8.2020     | 143.10               | 11.37                     | 151.76                                                       | 110.11                                                        | 68.01                                                         | 45.85                                                         | 12.59                                            | 150.08                                                   | 150.08                                                   | 247.20                                                   |
| 17    | 21.8.2020     | 20.00                | 1.87                      | 20.65                                                        | 16.38                                                         | 13.77                                                         | 12.16                                                         | 10.70                                            | 37.70                                                    | 44.40                                                    | 194.56                                                   |
| 18    | 29.8.2020     | 18.30                | 2.58                      | 28.71                                                        | 19.55                                                         | 16.47                                                         | 10.37                                                         | 7.09                                             | 25.50                                                    | 48.76                                                    | 48.76                                                    |
| 19    | 4.9.2020      | 21.70                | 4.15                      | 20.20                                                        | 14.36                                                         | 10.75                                                         | 8.16                                                          | 5.23                                             | 28.32                                                    | 38.32                                                    | 66.62                                                    |
| 20    | 6.9.2020      | 21.10                | 2.77                      | 74.46                                                        | 43.96                                                         | 23.58                                                         | 15.12                                                         | 7.62                                             | 42.80                                                    | 52.80                                                    | 71.60                                                    |
| 21    | 15.9.2020     | 30.00                | 2.51                      | 122.13                                                       | 57.71                                                         | 39.36                                                         | 26.31                                                         | 11.95                                            | 46.20                                                    | 58.30                                                    | 68.49                                                    |

#### Supplementary Table S4

**Rainfall events classification as per Indian Metrologic Department (IMD)\* –**

| Sl. No. | Classification    | Rainfall (R) (mm/day) |
|---------|-------------------|-----------------------|
| 1       | Light rain        | $0.0 < R \leq 10.0$   |
| 2       | Moderate rain     | $10.0 < R \leq 35.5$  |
| 3       | Rather heavy rain | $35.5 < R \leq 64.4$  |
| 4       | Heavy rain        | $64.4 < R \leq 124.4$ |
| 5       | Very heavy rain   | $R > 124.4$           |

\*IMD, 2018. Classification of Indian rainfall.
