# Supplementary material
Source: MDPI journal article supplement (https://www.mdpi.com/2071-1050/15/10/8285)
Supplement: s1 [file s1]

## Supplementary Figures

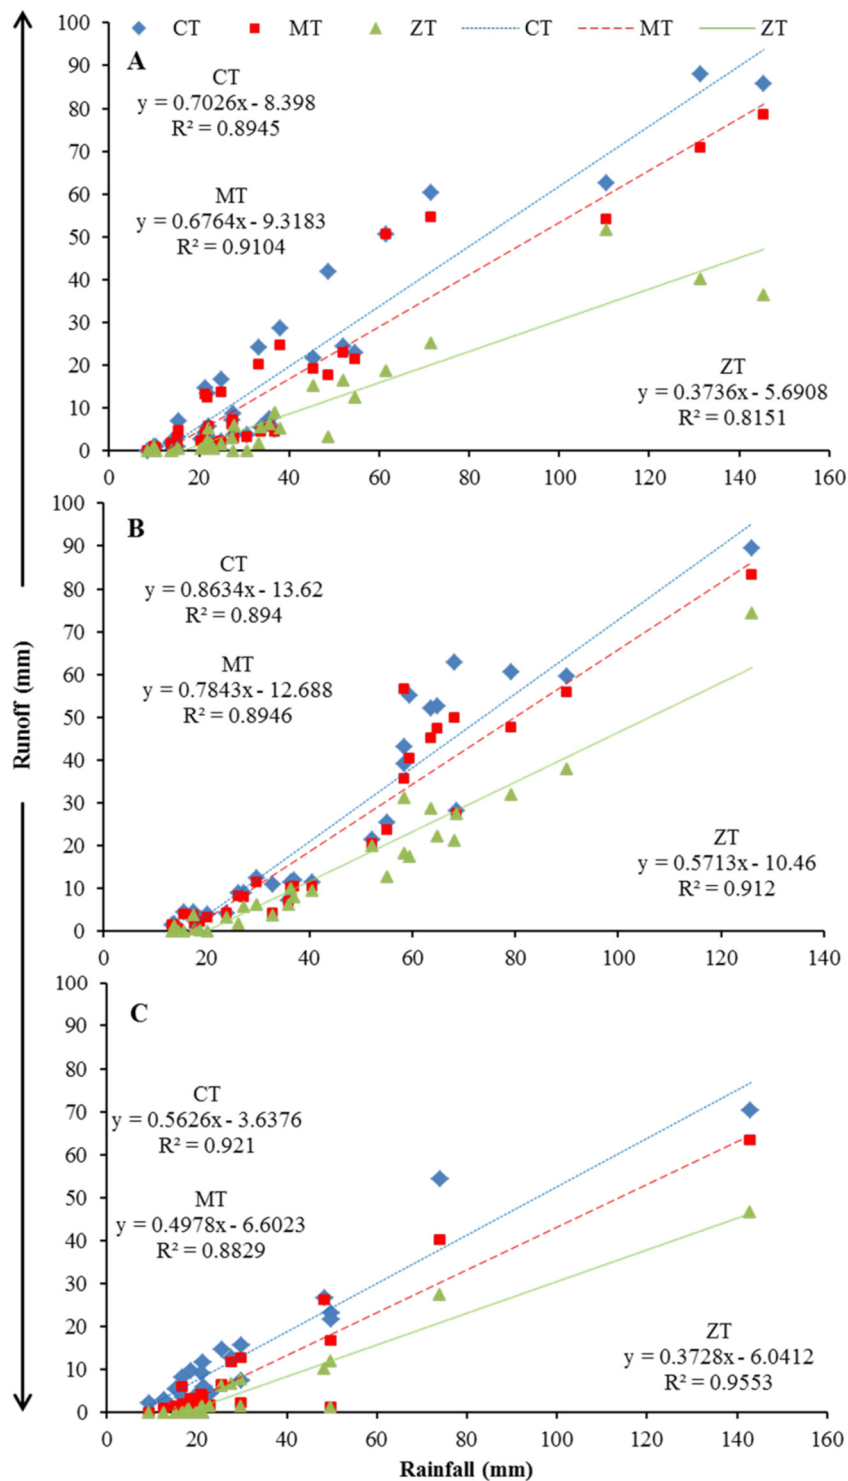

**Supplement Figure S1.** Relation between rainfall and runoff for different tillage treatments from 2018 to 2020. **A** represents the relation between rainfall and runoff during 2018, **B** represents the relation between rainfall and runoff during 2019 and **C** represents the relation

between rainfall and runoff during 2020. Treatments are Conventional tillage (CT), Minimum tillage (MT) and Zero tillage (ZT).

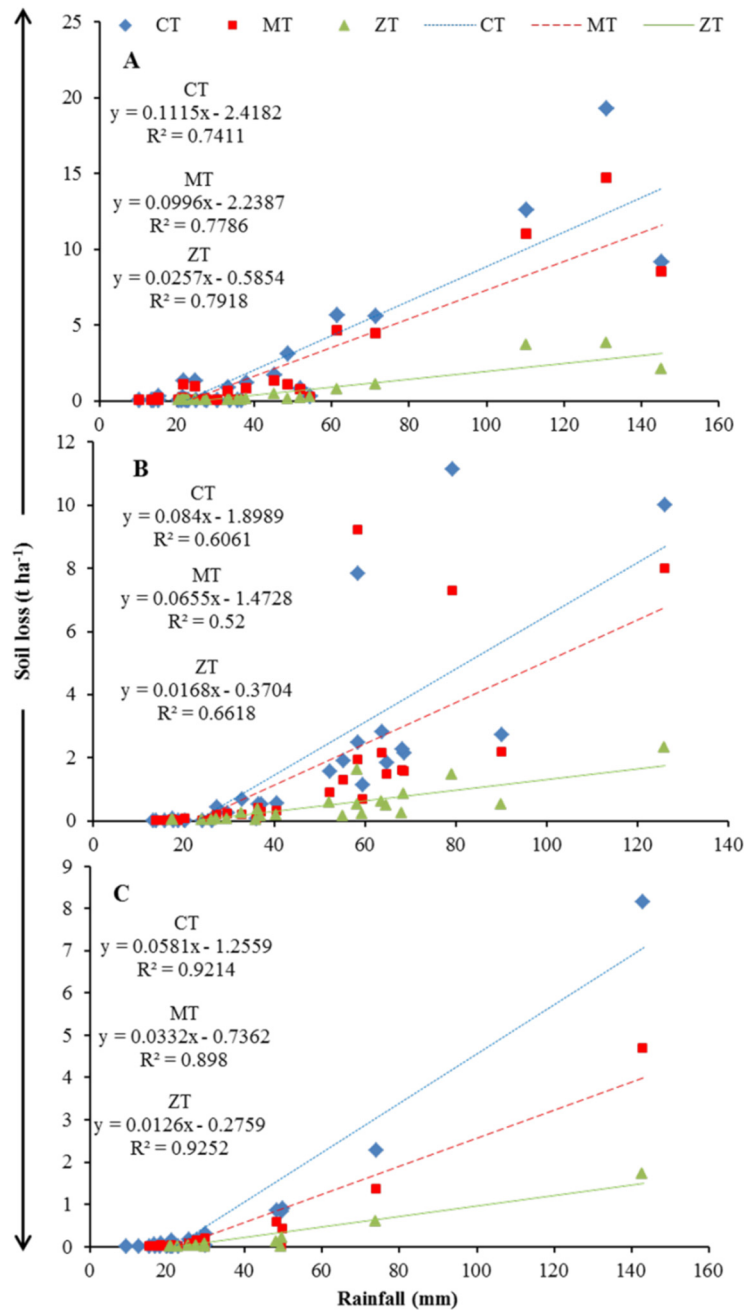

**Supplement Figure S2.** Relation between rainfall and soil loss for different tillage treatments from 2018 to 2020. **A** represents the relation between rainfall and soil loss during 2018, **B** represents the relation between rainfall and soil loss during 2019 and **C** represents the relation between rainfall and soil loss during 2020. Treatments are Conventional tillage (CT), Minimum tillage (MT) and Zero tillage (ZT).

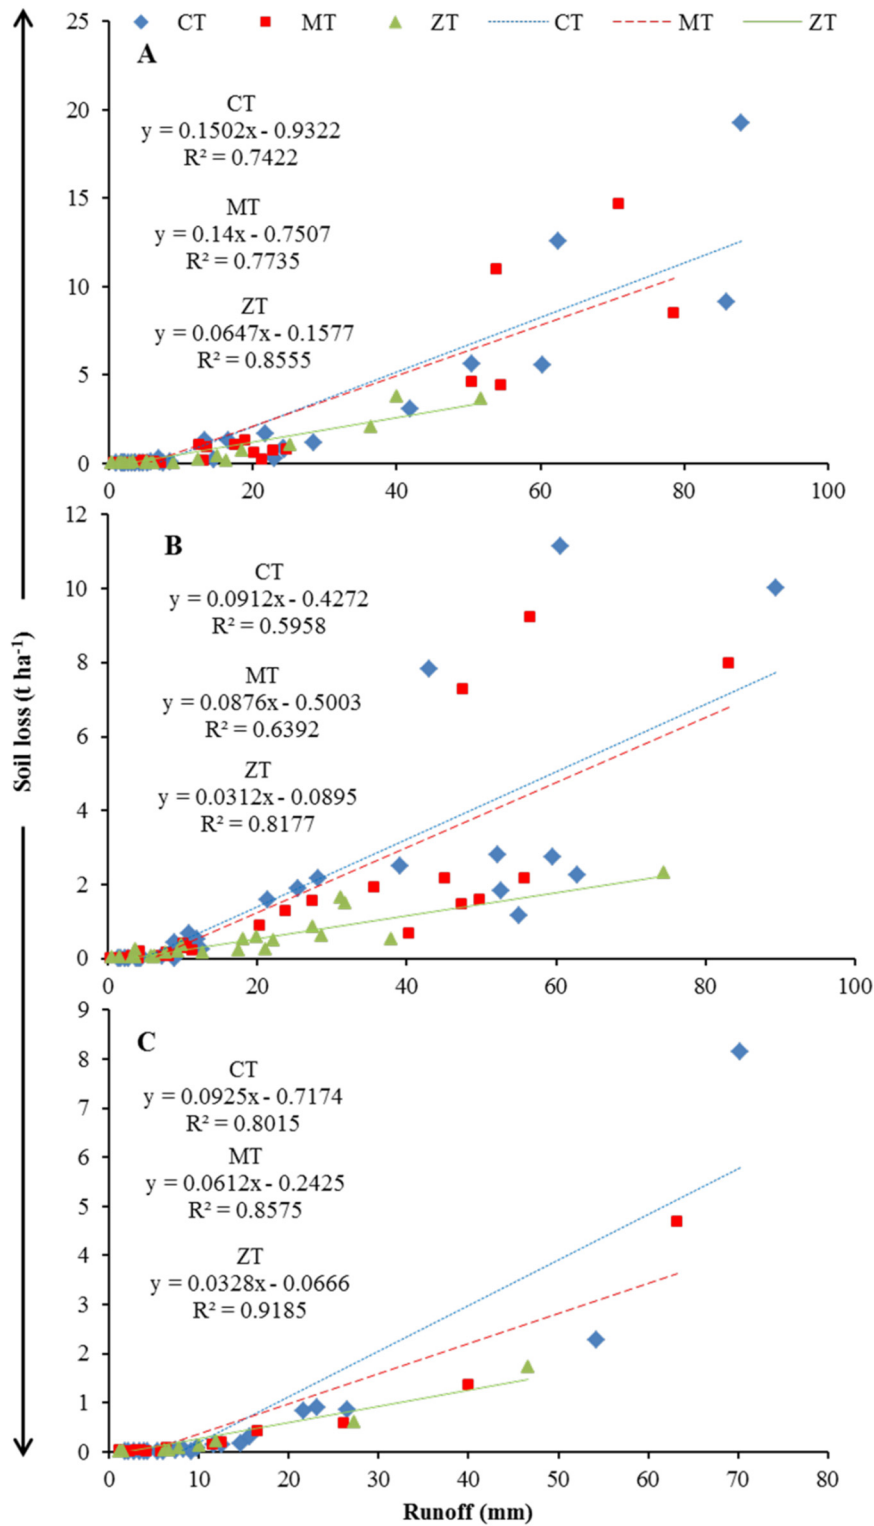

**Supplement Figure S3.** Relation between runoff and soil loss for different tillage treatments from 2018 to 2020. **A** represents the relation between runoff and soil loss during 2018, **B** represents the relation between runoff and soil loss during 2019 and **C** represents the relation between runoff and soil loss during 2020. Treatments are Conventional tillage (CT), Minimum tillage (MT) and Zero tillage (ZT).

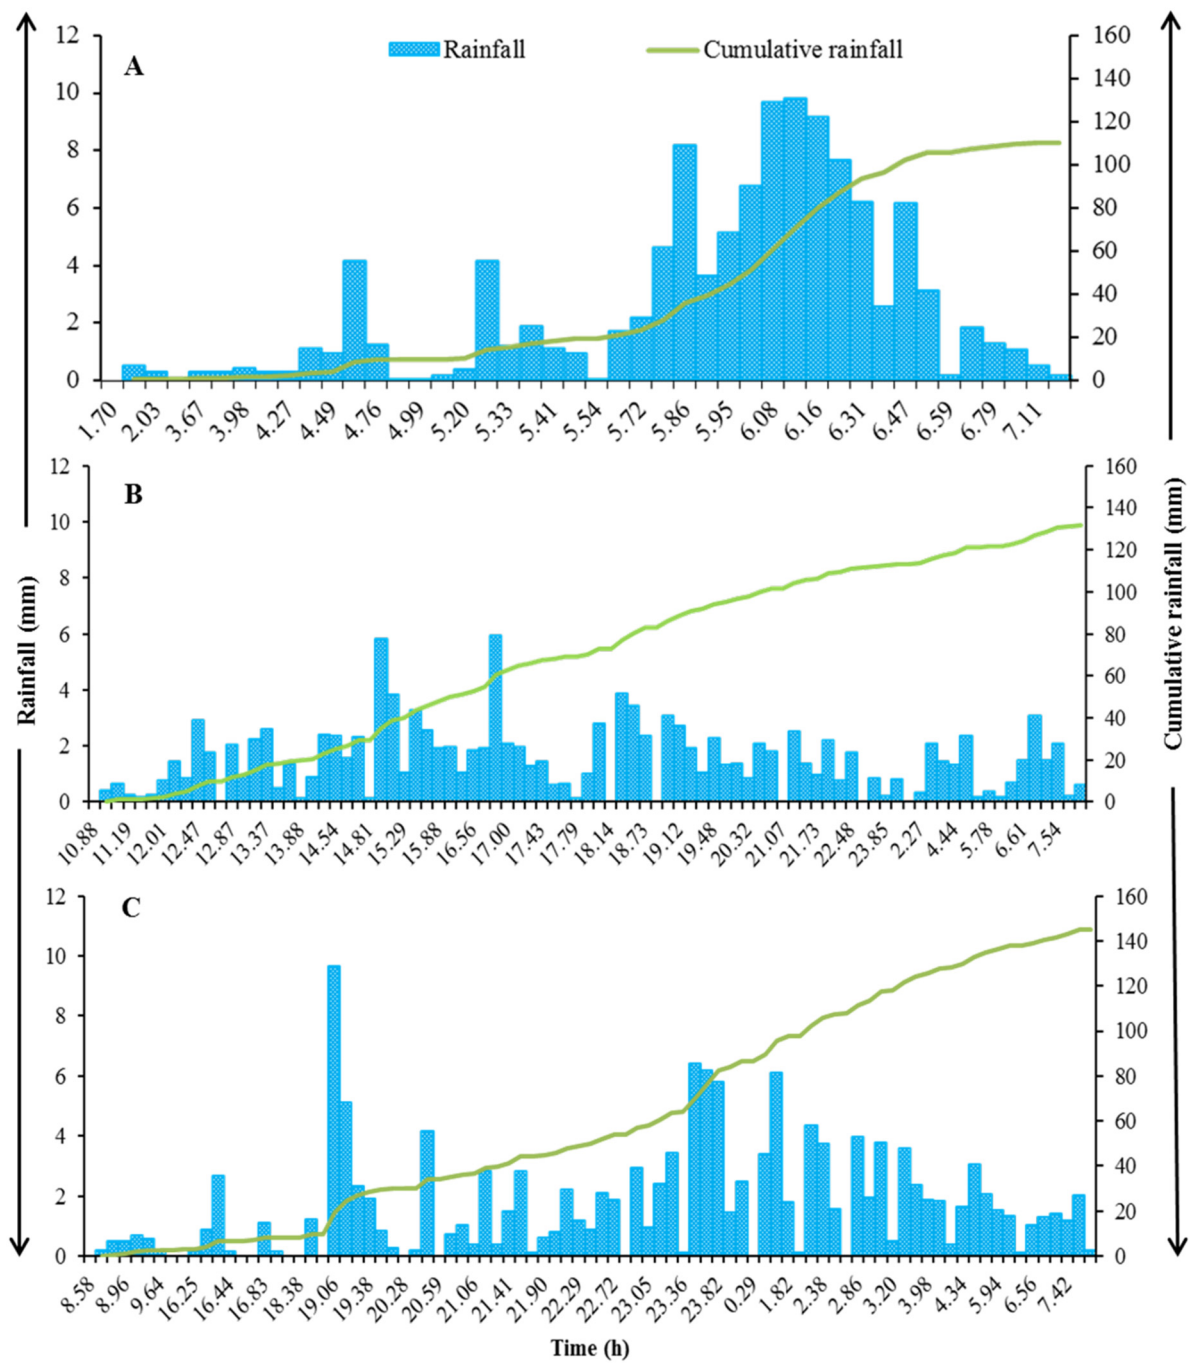

**Supplement Figure S4.** Characteristics of three extreme rainfall events during 2018.

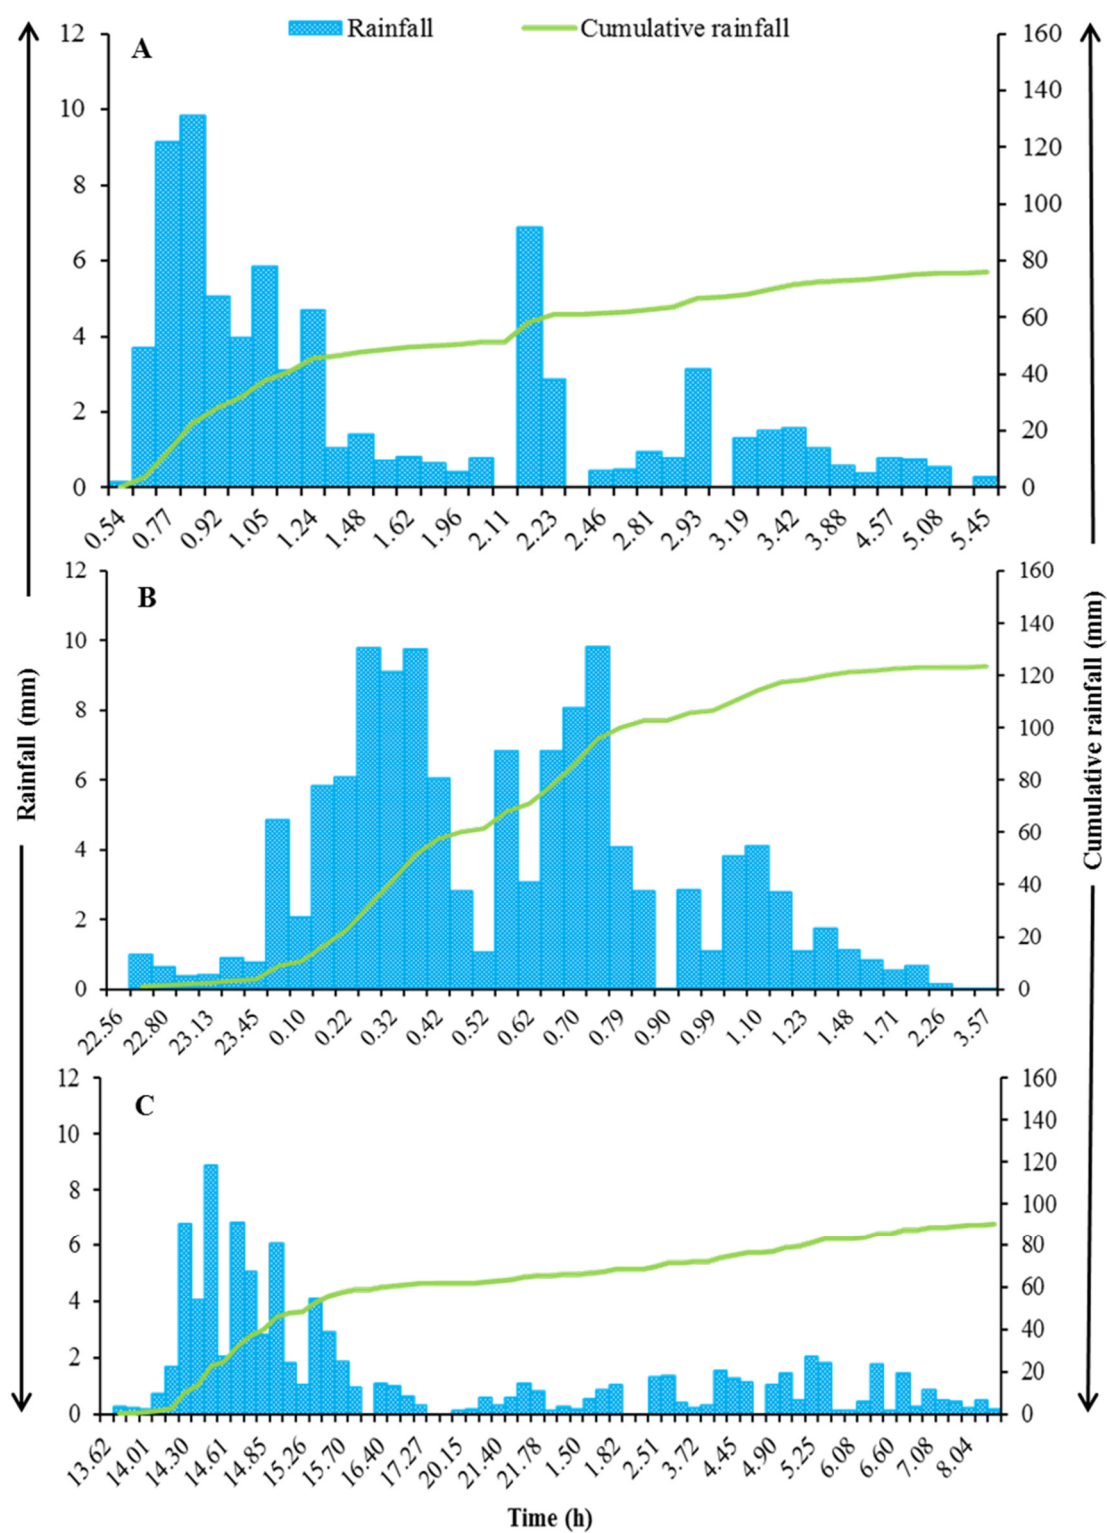

**Supplement Figure S5.** Characteristics of three extreme rainfall events during 2019.

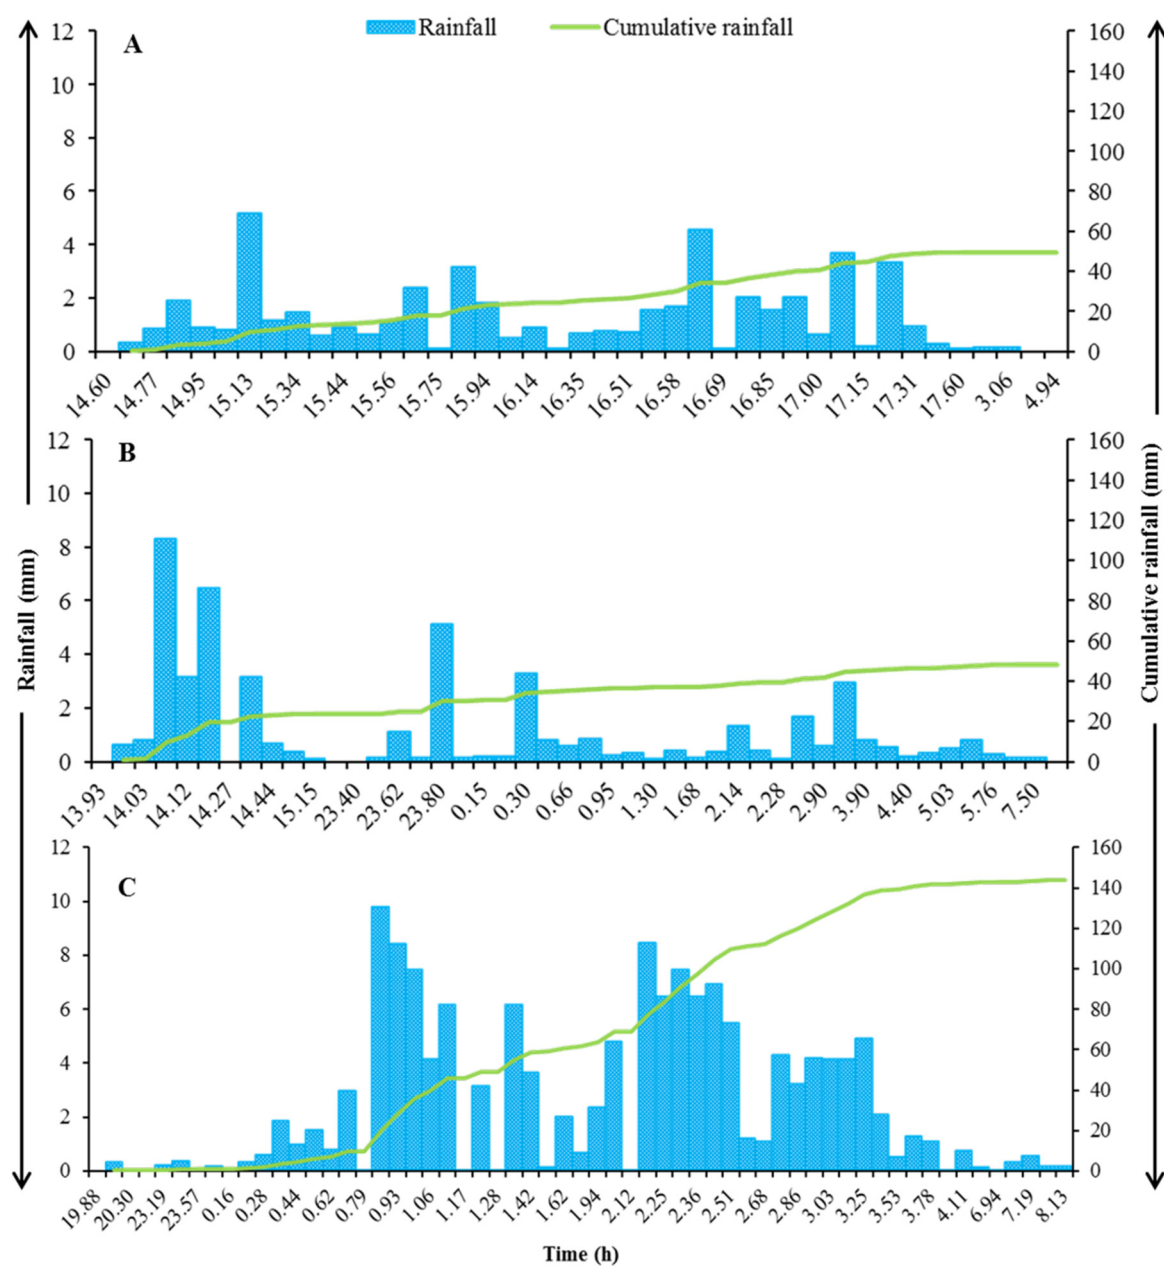

**Supplement Figure S6.** Characteristics of three extreme rainfall events during 2020.



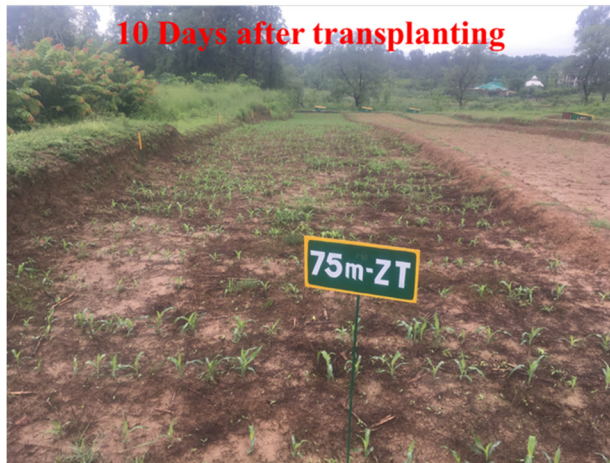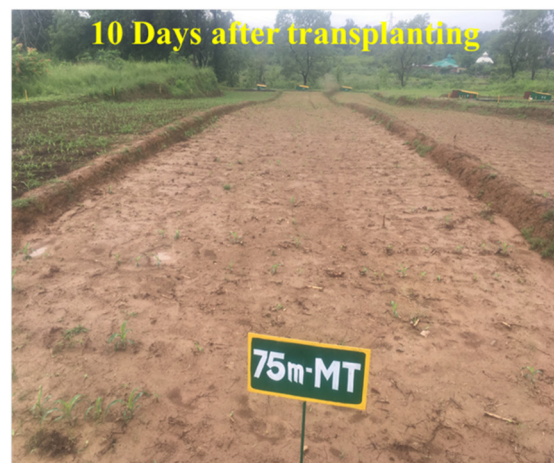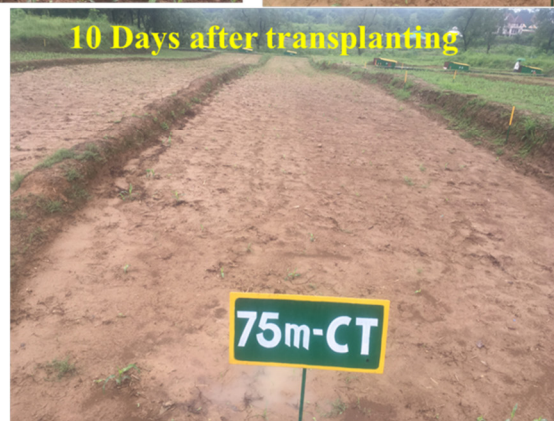

**Supplement Figure S7** Plat growth after 10 days from the date of showing under different tillage practices.

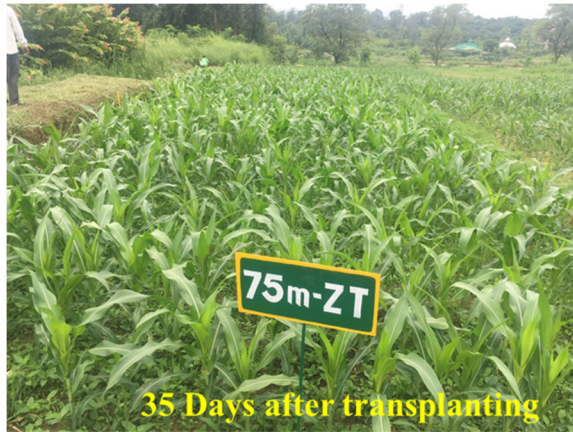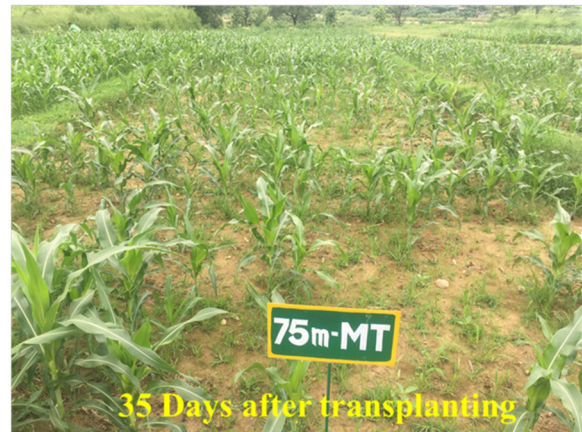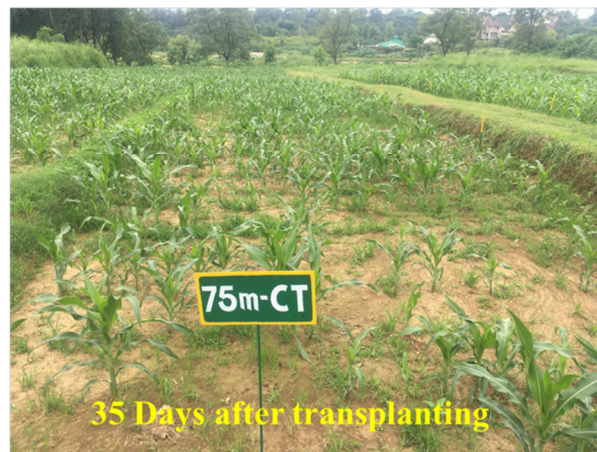

**Supplement Figure S8.** Plant growth after 35 days from the date of showing under different tillage practices.



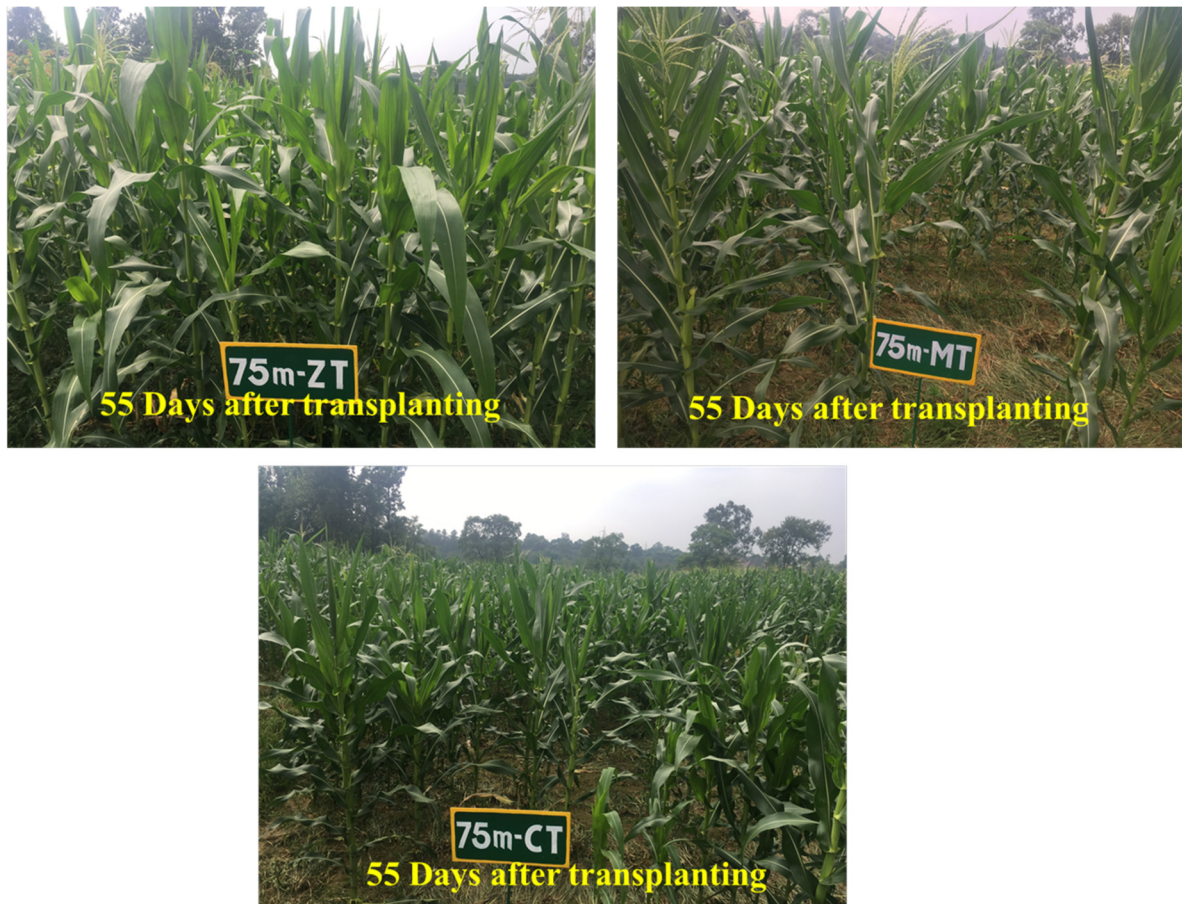

**Supplement Figure S9.** Plat growth after 55 days from the date of showing under different tillage practices.

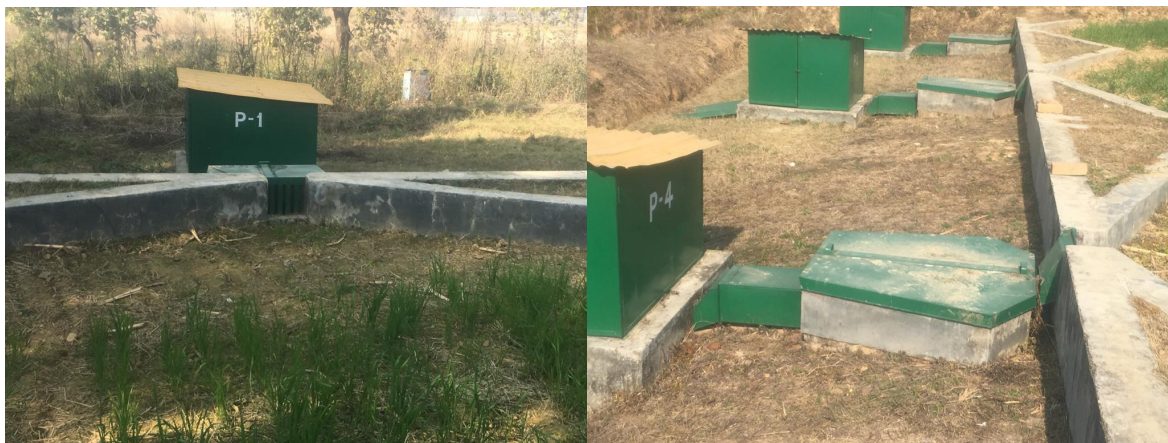

**Supplement Figure S10.** Two-stage multi-slots devisor with runoff collection tanks
